# Supplementary material for: Multi-Epigenome-Wide Analyses and Meta-Analysis of Child Maltreatment in Judicial Autopsies and Intervened Children and Adolescents
Source: Research Square preprint supplement (doi:10.21203/rs.3.rs-3287603/v1), 2023-09-15
Supplement: Supplementary file 1 [file 01b990b9a773195d69bde88c.xlsx]

## Sheet: S_Table1
Supplementary Table 1 Differentially methylated positions (DMPs) associated with child maltreatment in blood samples of Judicial Autopsy Cases.
probe	Chr	MAPINFO	UCSC_RefGene_Group	Relation_to_UCSC_CpG_Island	Gene_Name	t-value	P-value	FDR
cg18285462	20	51022181				-6.69643	2.14e-11	7.33e-06
cg01258201	6	36808494	TSS1500	Island	CPNE5	-6.66754	2.6e-11	7.33e-06
cg13381235	10	64120814				-6.66306	2.68e-11	7.33e-06
cg18366541	17	65854797	Body;Body		BPTF;BPTF	-6.56845	5.08e-11	1.04e-05
cg17195739	4	185252029				-6.21744	5.05e-10	7.05e-05
cg26205385	5	38347843	Body;Body		EGFLAM;EGFLAM	-6.21437	5.15e-10	7.05e-05
cg06920399	19	29218653		Island		6.1737	6.67e-10	7.82e-05
cg22646780	7	158769835		S_Shelf		5.85961	4.64e-09	0.000475807
cg19389973	7	36692197	Body		AOAH	-5.59578	2.2e-08	0.00200217
cg05166317	7	158857428	Body	S_Shore	VIPR2	-5.54109	3.01e-08	0.00201837
cg06389521	1	226016396	5'UTR;5'UTR;5'UTR		EPHX1;EPHX1;EPHX1	-5.54066	3.01e-08	0.00201837
cg17016777	5	4207689				5.53043	3.19e-08	0.00201837
cg18757817	2	208572165		N_Shelf		5.53023	3.2e-08	0.00201837
cg04653029	19	41356919	TSS1500	S_Shelf	CYP2A6	-5.50198	3.76e-08	0.00211372
cg11422312	5	1110019	Body	N_Shore	SLC12A7	-5.49219	3.97e-08	0.00211372
cg20262857	8	81718227	Body		ZNF704	5.48554	4.12e-08	0.00211372
cg16523850	6	54156824				-5.45088	5.01e-08	0.00241888
cg12667521	19	29218732		Island		5.40869	6.35e-08	0.00289374
cg10992590	2	130940487	TSS200;TSS200;TSS200;TSS200;TSS200;TSS200;Body;TSS200	S_Shore	SMPD4;SMPD4;SMPD4;SMPD4;SMPD4;SMPD4;FAM128B;SMPD4	5.37295	7.75e-08	0.00334469
cg15557168	22	42548783		Island		5.32178	1.03e-07	0.00421535
cg04083966	1	203144832	1stExon		MYBPH	-5.29295	1.2e-07	0.00466112
cg07721756	7	48019419	TSS200;TSS200	S_Shore	HUS1;HUS1	-5.28605	1.25e-07	0.00466112
cg02921824	3	108070732	ExonBnd;ExonBnd;ExonBnd;ExonBnd;ExonBnd;Body;Body;Body;Body;Body		HHLA2;HHLA2;HHLA2;HHLA2;HHLA2;HHLA2;HHLA2;HHLA2;HHLA2;HHLA2	-5.26901	1.37e-07	0.0048928
cg02954704	1	161349006				-5.25801	1.46e-07	0.00497802
cg25597117	1	161349116				-5.24189	1.59e-07	0.005216
cg21007846	20	11185984				-5.22328	1.76e-07	0.00554678
cg05811542	9	91392822				-5.19751	2.02e-07	0.00613737
cg10325659	14	94423950	TSS200		ASB2	-5.16914	2.35e-07	0.0066534
cg21441507	1	161337603	Body		C1orf192	5.17155	2.32e-07	0.0066534
cg03799230	11	80184550				5.14968	2.61e-07	0.00713605
cg10384133	9	45733081		N_Shore		-5.13146	2.88e-07	0.00760901
cg01812070	2	71016724	Body	N_Shore	FIGLA	-5.11971	3.06e-07	0.00784567
cg07070301	20	56728063	Body	S_Shore	C20orf85	5.10843	3.25e-07	0.00807625
cg05430201	1	67205292	Body;Body		SGIP1;SGIP1	-5.08064	3.76e-07	0.00907708
cg19153567	1	165414604	TSS200;TSS200;TSS200		RXRG;RXRG;RXRG	5.07403	3.89e-07	0.00912986
cg03517120	11	109940454				-5.06205	4.15e-07	0.00945253
cg06598794	3	39371110	TSS200		CCR8	5.04255	4.59e-07	0.0101863
cg26958677	5	5382000				5.03665	4.74e-07	0.0102285
cg14096615	12	16762843				5.02729	4.97e-07	0.0104653
cg06273195	3	115099894				4.92668	8.36e-07	0.0171553
cg03432749	3	45241597				-4.91245	8.99e-07	0.0175698
cg05935415	14	63506901	Body;Body		KCNH5;KCNH5	4.91452	8.9e-07	0.0175698
cg01005055	10	91135099				-4.84748	1.25e-06	0.0226536
cg16775095	15	66947066		N_Shore		-4.84455	1.27e-06	0.0226536
cg01661364	6	2128147	Body;Body		GMDS;GMDS	-4.84437	1.27e-06	0.0226536
cg08710039	1	64475514	Body;Body		ROR1;ROR1	4.85166	1.22e-06	0.0226536
cg04155520	22	18540600				-4.81007	1.51e-06	0.0263376
cg20538696	4	173698973	Body		GALNTL6	-4.8016	1.57e-06	0.0269037
cg20544932	10	32499398				4.78835	1.68e-06	0.0281554
cg13713563	10	78314461	Body;Body;Body		C10orf11;C10orf11;C10orf11	4.78381	1.72e-06	0.0282238
cg20312287	5	124254507				-4.77645	1.78e-06	0.0287026
cg09096787	10	131682386	Body	N_Shelf	EBF3	-4.75955	1.94e-06	0.0306122
cg19318113	5	8247401				4.74047	2.13e-06	0.0330076
cg27546017	9	120480847				-4.72133	2.34e-06	0.0343647
cg13201942	15	81344662				-4.72111	2.35e-06	0.0343647
cg15627180	11	117970688	Body;Body		TMPRSS4;TMPRSS4	4.72284	2.33e-06	0.0343647
cg17668271	12	132321704	Body	N_Shelf	MMP17	4.70211	2.57e-06	0.0368349
cg04733826	7	158769935		S_Shelf		4.69981	2.6e-06	0.0368349
cg14038933	6	6675339				-4.68352	2.82e-06	0.0373729
cg24382249	15	66947171		N_Shore		-4.67961	2.87e-06	0.0373729
cg19529604	2	153246184	Body		FMNL2	-4.67403	2.95e-06	0.0373729
cg20787649	1	17636898	Body		PADI4	-4.67069	3e-06	0.0373729
cg01418409	2	178540308	Body;Body;Body;Body		PDE11A;PDE11A;PDE11A;PDE11A	4.68415	2.81e-06	0.0373729
cg18937085	6	64592399	Body;Body		EYS;EYS	4.67845	2.89e-06	0.0373729
cg21929744	2	201577878				4.67351	2.96e-06	0.0373729
cg08666080	4	41660281	Body;Body;Body;Body;Body;Body;Body		LIMCH1;LIMCH1;LIMCH1;LIMCH1;LIMCH1;LIMCH1;LIMCH1	4.67038	3.01e-06	0.0373729
cg04526104	2	217839249				4.66346	3.11e-06	0.0380754
cg00293718	11	10662026	5'UTR;5'UTR;5'UTR;Body;Body;Body		MRVI1;MRVI1;MRVI1;MRVI1;MRVI1;MRVI1	-4.64939	3.33e-06	0.0394914
cg01059116	1	54163070	5'UTR		GLIS1	-4.64904	3.33e-06	0.0394914
cg08896901	4	152996165				-4.64398	3.42e-06	0.0394914
cg17527119	7	55035402				4.64566	3.39e-06	0.0394914
cg26024401	6	24330612	Body;Body		DCDC2;DCDC2	4.63779	3.52e-06	0.0395673
cg23187101	19	1812290	TSS200	Island	ATP8B3	4.63672	3.54e-06	0.0395673
cg05992904	22	48892994	Body	N_Shelf	FAM19A5	4.63347	3.6e-06	0.0395673
cg18009574	11	19744280	Body;Body;Body		NAV2;NAV2;NAV2	4.63226	3.62e-06	0.0395673
cg12156873	2	3487412				4.62733	3.7e-06	0.0398531
cg14535460	5	167079764	Body		TENM2	4.62532	3.74e-06	0.0398531
cg23372011	15	67418047	TSS200;Body		SMAD3;SMAD3	-4.61817	3.87e-06	0.0407203
cg00484695	17	26292504				4.60449	4.13e-06	0.0429406
cg20761997	17	71762559	Body		LINC00469	4.59178	4.39e-06	0.0450718
cg16083558	6	35109722	TSS1500;TSS1500	S_Shore	TCP11;TCP11	-4.58629	4.51e-06	0.0451444
cg15496866	6	40491590	5'UTR		LRFN2	4.58655	4.51e-06	0.0451444
cg09330192	5	115296978	TSS1500	N_Shore	LVRN	4.57734	4.71e-06	0.046197
cg08586692	4	80247088	1stExon;5'UTR		NAA11;NAA11	4.57543	4.75e-06	0.046197
cg08734093	1	11322728	TSS200	Island	MTOR	4.57395	4.79e-06	0.046197
cg24731218	5	13033143				4.56671	4.95e-06	0.047265
cg10829061	11	59069567				4.56291	5.04e-06	0.0475751
cg10006377	3	108248998	TSS1500		MYH15	-4.54612	5.46e-06	0.0489949
cg17102269	8	3830691	Body		CSMD1	-4.54133	5.59e-06	0.0489949
cg07545714	3	122135128	TSS1500	S_Shore	WDR5B	4.55416	5.26e-06	0.0489949
cg22851821	4	27178281				4.54935	5.38e-06	0.0489949
cg14777561	11	20180336	Body	N_Shore	DBX1	4.54344	5.53e-06	0.0489949
cg23671950	22	27456494				4.54052	5.61e-06	0.0489949
cg17981082	2	63815562	TSS1500;TSS1500;1stExon;5'UTR;TSS200	Island	MDH1;MDH1;WDPCP;WDPCP;MDH1	4.54045	5.61e-06	0.0489949
Chr: chromosome, MAPINFO: hg19 position coordinate, FDR: Benjamini-Hochberg false discovery rate

## Sheet: S_Table2
Supplementary Table 2 Differentially methylated positions (DMPs) associated with thymus weight ratio.
probe	Chr	MAPINFO	UCSC_RefGene_Group	Relation_to_UCSC_CpG_Island	Gene_Name	r	P-value
cg18757817	2	208572165		N_Shelf		-0.711669	0.00198808
cg01059116	1	54163070	5'UTR		GLIS1	0.662508	0.00516539
cg06389521	1	226016396	5'UTR;5'UTR;5'UTR		EPHX1;EPHX1;EPHX1	0.632444	0.00856506
cg22851821	4	27178281				-0.618498	0.010649
cg13713563	10	78314461	Body;Body;Body		C10orf11;C10orf11;C10orf11	-0.609197	0.0122472
cg17668271	12	132321704	Body	N_Shelf	MMP17	-0.599827	0.014042
cg14777561	11	20180336	Body	N_Shore	DBX1	-0.593598	0.0153446
cg23372011	15	67418047	TSS200;Body		SMAD3;SMAD3	0.592221	0.0156448
cg14038933	6	6675339				0.591898	0.0157159
cg21929744	2	201577878				-0.591012	0.0159123
cg26205385	5	38347843	Body;Body		EGFLAM;EGFLAM	0.589725	0.0162007
cg16523850	6	54156824				0.587305	0.0167543
cg17195739	4	185252029				0.584788	0.0173456
cg03517120	11	109940454				0.58105	0.0182531
cg07070301	20	56728063	Body	S_Shore	C20orf85	-0.58034	0.0184298
cg00293718	11	10662026	5'UTR;5'UTR;5'UTR;Body;Body;Body		MRVI1;MRVI1;MRVI1;MRVI1;MRVI1;MRVI1	0.579709	0.0185877
cg18285462	20	51022181				0.573497	0.0201997
cg14096615	12	16762843				-0.57224	0.0205386
cg16083558	6	35109722	TSS1500;TSS1500	S_Shore	TCP11;TCP11	0.571433	0.0207585
cg20262857	8	81718227	Body		ZNF704	-0.568734	0.0215072
cg12156873	2	3487412				-0.566958	0.0220112
cg26958677	5	5382000				-0.565423	0.0224539
cg17527119	7	55035402				-0.563948	0.022886
cg10992590	2	130940487	TSS200;TSS200;TSS200;TSS200;TSS200;TSS200;Body;TSS200	S_Shore	SMPD4;SMPD4;SMPD4;SMPD4;SMPD4;SMPD4;FAM128B;SMPD4	-0.562884	0.0232015
cg20544932	10	32499398				-0.562258	0.0233887
cg04083966	1	203144832	1stExon		MYBPH	0.560404	0.0239499
cg04155520	22	18540600				0.559065	0.0243617
cg19318113	5	8247401				-0.558228	0.0246218
cg00484695	17	26292504				-0.554142	0.0259224
cg18366541	17	65854797	Body;Body		BPTF;BPTF	0.548352	0.0278549
cg05992904	22	48892994	Body	N_Shelf	FAM19A5	-0.545483	0.0288523
cg01661364	6	2128147	Body;Body		GMDS;GMDS	0.543846	0.0294332
cg18937085	6	64592399	Body;Body		EYS;EYS	-0.543425	0.0295844
cg17102269	8	3830691	Body		CSMD1	0.542543	0.0299022
cg05430201	1	67205292	Body;Body		SGIP1;SGIP1	0.542535	0.0299051
cg11422312	5	1110019	Body	N_Shore	SLC12A7	0.53951	0.0310157
cg17981082	2	63815562	TSS1500;TSS1500;1stExon;5'UTR;TSS200	Island	MDH1;MDH1;WDPCP;WDPCP;MDH1	-0.536307	0.032226
cg15627180	11	117970688	Body;Body		TMPRSS4;TMPRSS4	-0.535938	0.0323676
cg05811542	9	91392822				0.535658	0.0324754
cg24731218	5	13033143				-0.535482	0.0325431
cg13201942	15	81344662				0.533033	0.0334994
cg19529604	2	153246184	Body		FMNL2	0.531375	0.0341586
cg08586692	4	80247088	1stExon;5'UTR		NAA11;NAA11	-0.528501	0.0353248
cg08666080	4	41660281	Body;Body;Body;Body;Body;Body;Body		LIMCH1;LIMCH1;LIMCH1;LIMCH1;LIMCH1;LIMCH1;LIMCH1	-0.526608	0.036109
cg15496866	6	40491590	5'UTR		LRFN2	-0.522838	0.0377103
cg01005055	10	91135099				0.522202	0.0379855
cg10006377	3	108248998	TSS1500		MYH15	0.516749	0.0404088
cg06273195	3	115099894				-0.516509	0.040518
cg18009574	11	19744280	Body;Body;Body		NAV2;NAV2;NAV2	-0.516506	0.0405193
cg27546017	9	120480847				0.515707	0.0408846
cg09096787	10	131682386	Body	N_Shelf	EBF3	0.51486	0.0412747
cg10829061	11	59069567				-0.514045	0.0416525
cg08896901	4	152996165				0.513676	0.0418244
cg02921824	3	108070732	ExonBnd;ExonBnd;ExonBnd;ExonBnd;ExonBnd;Body;Body;Body;Body;Body		HHLA2;HHLA2;HHLA2;HHLA2;HHLA2;HHLA2;HHLA2;HHLA2;HHLA2;HHLA2	0.509451	0.0438309
cg06598794	3	39371110	TSS200		CCR8	-0.509439	0.0438371
cg20761997	17	71762559	Body		LINC00469	-0.508382	0.04435
cg26024401	6	24330612	Body;Body		DCDC2;DCDC2	-0.507953	0.0445596
cg07721756	7	48019419	TSS200;TSS200	S_Shore	HUS1;HUS1	0.506256	0.0453959
cg08734093	1	11322728	TSS200	Island	MTOR	-0.502906	0.0470811
cg05166317	7	158857428	Body	S_Shore	VIPR2	0.501743	0.0476769
cg14535460	5	167079764	Body		TENM2	-0.499498	0.0488427
cg08710039	1	64475514	Body;Body		ROR1;ROR1	-0.498359	0.0494426
Chr: chromosome, MAPINFO: hg19 position coordinate

## Sheet: S_Table3
Supplementary Table 3 Differentially methylated regions (DMRs) associated with child maltreatment in blood samples of Judicial Autopsy Cases.
DMR	Chr	Start	End	Length	CpGs	Gene	Direction	P-value
DMR1	19	29217858	29218774	917	7	AC005307.3	+	3.22991e-07
DMR2	13	88328009	88329680	1672	10	SLITRK5	+	8.21761e-07
DMR3	14	24780167	24780926	760	13	LTB4R2, LTB4R, CIDEB	+	9.57331e-07
DMR4	4	2403559	2404284	726	8	ZFYVE28	+	1.4037e-06
DMR5	1	203320190	203321087	898	12	FMOD	+	1.70196e-06
DMR6	17	46018654	46019184	531	14	PNPO, AC003665.1	+	1.83651e-06
DMR7	15	66947066	66947617	552	7	RP11-321F6.1	-	4.06003e-06
DMR8	6	33282418	33283317	900	28	ZBTB22	+	6.63706e-06
DMR9	13	47472050	47472429	380	12	NA	+	1.19934e-05
DMR10	2	206628355	206628773	419	10	NRP2, AC007362.3	+	1.39695e-05
DMR11	7	27225733	27226329	597	8	HOXA11-AS, RP1-170O19.14	-	0.000247117
DMR12	9	98533868	98534327	460	4	LINC00476	-	0.000312003
DMR13	6	33279563	33280713	1151	19	TAPBP	+	0.000660469
DMR14	5	78281684	78282099	416	9	ARSB	-	0.000692922
DMR15	10	134144355	134144864	510	4	STK32C	+	0.000834997
DMR16	10	115327005	115327194	190	4	HABP2	+	0.00097581
DMR17	3	122134820	122135006	187	4	WDR5B	+	0.00261848
DMR18	1	161349006	161349116	111	2	RRM2P2	-	0.00290157
DMR19	22	44464723	44465038	316	7	PARVB	-	0.00311859
DMR20	1	161337400	161337828	429	6	RP11-122G18.5, C1orf192	+	0.00328898
Chr: chromosome, Start/End: start and end position of DMR (hg19), Length: Length of DMR (bp), CpGs: the number of CpGs measured within the DMR, Gene: genes that span the DMR, Direction: direction of the relation between group (CM/TD) and DNA methylation levels (+: increased methylation in CM; -: decreased methylation in CM), p-value: Stouffer p value of the DMR.

## Sheet: S_Table4
Supplementary Table 4 Brain-blood correlations of DMPs associated with child maltreatment in blood samples of Judicial Autopsy Cases.
probe	Gene_Name	brain_mean	brain_sd	blood_mean	blood_sd	rho_brain_blood	p_rho_brain_blood	brain_mean_adj	brain_sd_adj	blood_mean_adj	blood_sd_adj	rho_brain_blood_adj	p_rho_brain_blood_adj
cg18285462		0.802184	0.180858	0.108824	0.0318437	0.00175439	0.997125	0.729059	0.182551	0.097398	0.018725	-0.112281	0.6465
cg01258201	CPNE5	0.191274	0.156559	0.0524811	0.0222585	-0.229825	0.34234	0.393975	0.149161	0.0390187	0.0112736	-0.0947368	0.699383
cg13381235		0.692594	0.149499	0.663391	0.119427	0.864912	0	0.711117	0.143899	0.594254	0.111097	0.801754	4.64892e-05
cg18366541	BPTF;BPTF	0.347279	0.0913787	0.466584	0.0758643	0.622807	0.00530932	0.303004	0.0875152	0.440755	0.0597967	0.626316	0.00500009
cg17195739		0.849143	0.0432803	0.952697	0.0217742	0.561404	0.0138004	0.863876	0.0409157	0.964168	0.0104713	0.503509	0.0296556
cg26205385	EGFLAM;EGFLAM	0.802084	0.16039	0.705878	0.109203	0.282456	0.240447	0.619401	0.15418	0.752647	0.0844732	0.175439	0.470896
cg06920399		NA	NA	NA	NA	NA	NA	NA	NA	NA	NA	NA	NA
cg22646780		NA	NA	NA	NA	NA	NA	NA	NA	NA	NA	NA	NA
cg19389973	AOAH	0.378224	0.278458	0.503376	0.345749	0.824561	8.14662e-06	0.344642	0.264654	0.520927	0.355589	0.822807	1.006e-05
cg05166317	VIPR2	0.894679	0.0336877	0.892833	0.0248657	0.698246	0.00122872	0.903688	0.0311217	0.901306	0.0210442	0.657895	0.00282231
cg06389521	EPHX1;EPHX1;EPHX1	0.701402	0.273619	0.730727	0.265335	0.859649	0	0.610537	0.295837	0.816251	0.230518	0.801754	4.64892e-05
cg17016777		0.74281	0.0786455	0.87416	0.0446342	0.245614	0.309401	0.760243	0.0764001	0.882006	0.0366766	0.296491	0.217079
cg18757817		NA	NA	NA	NA	NA	NA	NA	NA	NA	NA	NA	NA
cg04653029	CYP2A6	0.873223	0.0194252	0.881487	0.0261487	0.542105	0.0180412	0.891947	0.0164393	0.894166	0.0206355	0.387719	0.101889
cg11422312	SLC12A7	0.767975	0.160684	0.827559	0.160951	0.645614	0.00355061	0.738097	0.167219	0.828362	0.156365	0.677193	0.00192701
cg20262857	ZNF704	0.439594	0.153826	0.825383	0.0597985	-0.178947	0.461923	0.437399	0.154007	0.906146	0.0131995	-0.164912	0.498344
cg16523850		0.693711	0.111993	0.642223	0.133958	-0.152632	0.531341	0.735735	0.109669	0.749713	0.0724918	-0.152632	0.531341
cg12667521		0.429959	0.196011	0.508766	0.168493	0.850877	0	0.640968	0.173739	0.317345	0.0964883	0.614035	0.00615134
cg10992590	SMPD4;SMPD4;SMPD4;SMPD4;SMPD4;SMPD4;FAM128B;SMPD4	0.0545137	0.0265781	0.0465124	0.0224408	0.198246	0.414208	0.0788745	0.0309552	0.0553533	0.0224027	-0.126316	0.60535
cg15557168		0.671752	0.117545	0.781255	0.122115	0.587719	0.00935427	0.783522	0.0882444	0.788155	0.112955	0.557895	0.0145044
cg04083966	MYBPH	0.681487	0.204809	0.74648	0.220376	0.698246	0.00122872	0.595129	0.232182	0.782051	0.200324	0.838596	0
cg07721756	HUS1;HUS1	0.517332	0.142427	0.623861	0.145717	0.333333	0.16315	0.447857	0.133622	0.686321	0.122676	0.185965	0.444249
cg02921824	HHLA2;HHLA2;HHLA2;HHLA2;HHLA2;HHLA2;HHLA2;HHLA2;HHLA2;HHLA2	0.822283	0.116255	0.406111	0.092669	-0.329825	0.167835	0.734963	0.121599	0.380393	0.0489223	-0.163158	0.502994
cg02954704		0.725845	0.154777	0.753548	0.189852	0.857895	0	0.646869	0.171721	0.808211	0.146891	0.721053	0.000718586
cg25597117		0.658681	0.215962	0.731552	0.240006	0.817544	1.67023e-05	0.650807	0.217608	0.75583	0.213283	0.694737	0.00132804
cg21007846		0.519939	0.0879205	0.0325285	0.009931	-0.226316	0.349934	0.495334	0.0874424	0.0222263	0.00476155	-0.152632	0.531341
cg05811542		0.530204	0.136275	0.0908443	0.0328338	-0.412281	0.0806616	0.437823	0.119498	0.0519011	0.0101759	-0.331579	0.165481
cg10325659	ASB2	0.9638	0.0206829	0.954274	0.013145	0.142105	0.560424	0.957112	0.0228955	0.969661	0.00577594	-0.0684211	0.781263
cg21441507	C1orf192	NA	NA	NA	NA	NA	NA	NA	NA	NA	NA	NA	NA
cg03799230		0.93148	0.0797221	0.663316	0.0741165	-0.142105	0.560424	0.932092	0.0794007	0.723047	0.0485509	-0.231579	0.338581
cg10384133		0.622497	0.150947	0.635385	0.143913	0.801754	4.64892e-05	0.734805	0.118329	0.597432	0.125907	0.696491	0.0012776
cg01812070	FIGLA	NA	NA	NA	NA	NA	NA	NA	NA	NA	NA	NA	NA
cg07070301	C20orf85	0.901577	0.029883	0.84831	0.0492129	0.0789474	0.748184	0.870308	0.0348	0.866715	0.0225693	0.389474	0.100248
cg05430201	SGIP1;SGIP1	0.747566	0.0567334	0.139795	0.0485849	-0.0596491	0.809119	0.801703	0.0478932	0.0775003	0.0153318	-0.180702	0.457471
cg19153567	RXRG;RXRG;RXRG	0.215644	0.131496	0.219988	0.0562038	0.0368421	0.882528	0.208431	0.130065	0.176507	0.0395782	0.0368421	0.882528
cg03517120		0.785413	0.0737603	0.10643	0.0553291	0.110526	0.651719	0.859725	0.0570005	0.0412048	0.00807804	-0.180702	0.457471
cg06598794	CCR8	0.781961	0.0649927	0.845207	0.0554545	0.0491228	0.842843	0.712445	0.0677492	0.914612	0.0138682	0.150877	0.536138
cg26958677		0.653475	0.113795	0.787549	0.0907251	0.515789	0.0254528	0.839438	0.0621511	0.783229	0.0624033	-0.154386	0.526565
cg14096615		0.258162	0.175101	0.196396	0.116262	-0.107018	0.662204	0.312356	0.177515	0.139443	0.0865513	0.00175439	0.997125
cg06273195		0.0744493	0.15379	0.0708504	0.152353	0.412281	0.0806616	0.0360799	0.0743431	0.115677	0.156077	0.540351	0.0184736
cg03432749		NA	NA	NA	NA	NA	NA	NA	NA	NA	NA	NA	NA
cg05935415	KCNH5;KCNH5	0.669099	0.144926	0.466124	0.152813	0.198246	0.414208	0.735377	0.135336	0.472245	0.127367	-0.12807	0.600284
cg01005055		0.910541	0.134355	0.914866	0.131062	0.54386	0.0176169	0.912896	0.132001	0.970564	0.0307774	0.24386	0.312961
cg16775095		0.490298	0.232624	0.504177	0.278832	0.9	0	0.525284	0.243865	0.737334	0.251493	0.370175	0.119405
cg01661364	GMDS;GMDS	0.743013	0.0812976	0.097343	0.0332752	0.045614	0.854148	0.785737	0.0754027	0.0528786	0.00638146	0.273684	0.25586
cg08710039	ROR1;ROR1	0.841532	0.100482	0.766556	0.045573	-0.138596	0.570276	0.71039	0.102847	0.815516	0.0199909	-0.112281	0.6465
cg04155520		0.303751	0.0994796	0.820032	0.0513597	0.301754	0.208723	0.227195	0.0902657	0.87117	0.0211488	0.0561404	0.820326
cg20538696	GALNTL6	0.796251	0.155007	0.861813	0.0945415	0.182456	0.453041	0.73287	0.166303	0.87051	0.0666841	0.257895	0.285185
cg20544932		NA	NA	NA	NA	NA	NA	NA	NA	NA	NA	NA	NA
cg13713563	C10orf11;C10orf11;C10orf11	0.528099	0.101106	0.841559	0.0662588	0.0263158	0.916769	0.482437	0.0991522	0.921493	0.014232	-0.324561	0.175037
cg20312287		0.586795	0.114908	0.731396	0.0505829	0	1	0.598087	0.114276	0.685107	0.0415188	0.177193	0.466398
cg09096787	EBF3	0.584836	0.0922664	0.127152	0.0640429	0.0298246	0.905336	0.488721	0.0887313	0.0620047	0.0288705	0.521053	0.023804
cg19318113		0.772158	0.0443317	0.718078	0.0679495	0.273684	0.25586	0.7685	0.0446394	0.770578	0.0237446	-0.154386	0.526565
cg27546017		0.909643	0.0884764	0.721684	0.0687765	0.315789	0.187513	0.902825	0.0908704	0.694012	0.0626545	0.103509	0.672752
cg13201942		0.718024	0.0633242	0.074781	0.0315964	0.00877193	0.97413	0.754668	0.0589708	0.0421277	0.0104149	-0.0263158	0.916769
cg15627180	TMPRSS4;TMPRSS4	0.510004	0.120733	0.654669	0.157686	0.591228	0.00886209	0.484148	0.118764	0.745829	0.127183	0.798246	5.5546e-05
cg17668271	MMP17	0.571975	0.102718	0.781845	0.0623174	0.0649123	0.792376	0.693438	0.0878359	0.851139	0.01736	-0.0596491	0.809119
cg04733826		0.197229	0.217897	0.137591	0.210087	0.649123	0.00332846	0.153118	0.18071	0.138259	0.200709	0.417544	0.0765833
cg14038933		NA	NA	NA	NA	NA	NA	NA	NA	NA	NA	NA	NA
cg24382249		0.510502	0.0811534	0.500925	0.141564	0.4	0.0908126	0.542777	0.0802551	0.567687	0.116904	0.0649123	0.792376
cg19529604	FMNL2	0.942645	0.0360584	0.975732	0.00532223	0.426316	0.0701356	0.97004	0.016987	0.979461	0.00416339	0.0473684	0.848492
cg20787649	PADI4	0.803582	0.050789	0.706987	0.176751	0.282456	0.240447	0.819303	0.048836	0.606212	0.16899	0.292982	0.222772
cg01418409	PDE11A;PDE11A;PDE11A;PDE11A	0.221355	0.077506	0.817964	0.0454548	0.00701754	0.979878	0.11916	0.0455872	0.846398	0.0333507	-0.045614	0.854148
cg18937085	EYS;EYS	0.572747	0.0952774	0.725411	0.055809	-0.077193	0.753669	0.501616	0.0966082	0.777386	0.0368448	0.357895	0.132908
cg21929744		0.0294729	0.00456994	0.0359015	0.00864341	0.475439	0.0413366	0.0254039	0.00371846	0.0388553	0.00722481	0.287719	0.231498
cg08666080	LIMCH1;LIMCH1;LIMCH1;LIMCH1;LIMCH1;LIMCH1;LIMCH1	0.72817	0.0622784	0.81444	0.0488698	0.147368	0.545793	0.808993	0.0477152	0.876253	0.0190145	0.217544	0.369351
cg04526104		0.644444	0.129177	0.728848	0.0493951	0.0596491	0.809119	0.750161	0.123955	0.787138	0.0212597	-0.0684211	0.781263
cg00293718	MRVI1;MRVI1;MRVI1;MRVI1;MRVI1;MRVI1	0.509412	0.0973813	0.0248882	0.0101758	0.231579	0.338581	0.652942	0.0671478	0.0146718	0.00339546	0.0754386	0.759165
cg01059116	GLIS1	0.352629	0.172778	0.112307	0.0563143	0.822807	1.006e-05	0.139634	0.0957971	0.0943103	0.0505468	0.775439	0.000143992
cg08896901		NA	NA	NA	NA	NA	NA	NA	NA	NA	NA	NA	NA
cg17527119		0.944129	0.0272951	0.609732	0.101593	-0.054386	0.825943	0.930038	0.030696	0.704055	0.0414806	-0.284211	0.237439
cg26024401	DCDC2;DCDC2	0.31141	0.0711883	0.829216	0.0637966	0.331579	0.165481	0.200907	0.0400903	0.895413	0.0345882	0.357895	0.132908
cg23187101	ATP8B3	0.0760136	0.0438715	0.0804037	0.0413589	0.847368	0	0.0636699	0.0373134	0.0666209	0.0298795	0.761404	0.000232117
cg05992904	FAM19A5	0.891618	0.0583206	0.861887	0.0986976	0.605263	0.00709942	0.963378	0.0132081	0.814211	0.0946144	0.282456	0.240447
cg18009574	NAV2;NAV2;NAV2	0.681701	0.157147	0.792698	0.0231179	-0.0824561	0.73725	0.83537	0.131052	0.80866	0.0150998	0.0666667	0.786815
cg12156873		NA	NA	NA	NA	NA	NA	NA	NA	NA	NA	NA	NA
cg14535460	TENM2	0.843126	0.0664632	0.860352	0.0426594	-0.126316	0.60535	0.842635	0.0665306	0.879683	0.0214664	0.207018	0.393457
cg23372011	SMAD3;SMAD3	0.42245	0.154927	0.392932	0.0801219	0.0754386	0.759165	0.709405	0.0994564	0.3861	0.0645226	0.273684	0.25586
cg00484695		0.792965	0.157346	0.764281	0.0548384	0.077193	0.753669	0.703546	0.151869	0.830561	0.0169726	0.291228	0.225656
cg20761997	LINC00469	0.666126	0.0899596	0.772582	0.0467591	0.0578947	0.814718	0.820188	0.0355159	0.793632	0.0280169	0.149123	0.540955
cg16083558	TCP11;TCP11	0.837804	0.213928	0.830938	0.21994	0.589474	0.00910547	0.823753	0.227411	0.812111	0.21649	0.687719	0.00154617
cg15496866	LRFN2	0.886743	0.0398219	0.811122	0.041995	0.208772	0.389379	0.860588	0.0440198	0.872051	0.0160777	0.321053	0.179956
cg09330192	LVRN	0.53341	0.132825	0.494611	0.13349	0.463158	0.0474618	0.555032	0.130388	0.510653	0.118001	0.440351	0.0606897
cg08586692	NAA11;NAA11	0.867331	0.122959	0.916554	0.0195584	-0.0175439	0.945416	0.803739	0.122121	0.922046	0.0150642	-0.0105263	0.968384
cg08734093	MTOR	0.0326682	0.00623365	0.0353703	0.00739161	0.0649123	0.792376	0.0370453	0.00648357	0.0323027	0.00570172	0.077193	0.753669
cg24731218		0.835271	0.174928	0.786645	0.0415295	-0.312281	0.192671	0.630717	0.169477	0.838622	0.0233803	-0.12807	0.600284
cg10829061		0.672141	0.160884	0.725265	0.0352206	0.0912281	0.710136	0.357365	0.11323	0.769025	0.00965771	0.170175	0.484521
cg10006377	MYH15	0.851911	0.128551	0.9317	0.0152251	0.0561404	0.820326	0.837538	0.130361	0.926347	0.0156769	0.0280702	0.91105
cg17102269	CSMD1	0.414254	0.103779	0.235945	0.105479	0.278947	0.246537	0.612121	0.0660812	0.249989	0.0863024	0.470175	0.0438809
cg07545714	WDR5B	0.0434809	0.00970665	0.0409951	0.00874755	0.170175	0.484521	0.0472476	0.0105127	0.0398729	0.00807928	0.294737	0.219913
cg22851821		0.313926	0.0656506	0.7891	0.0706366	0.221053	0.36151	0.335514	0.0663516	0.781416	0.0636697	-0.177193	0.466398
cg14777561	DBX1	0.0289319	0.00761635	0.0421069	0.0151796	0.577193	0.010966	0.02492	0.00652687	0.0288485	0.00696468	0.447368	0.0563498
cg23671950		0.843491	0.0674911	0.891897	0.0504378	-0.194737	0.422674	0.933546	0.0264022	0.894509	0.0438149	0.182456	0.453041
cg17981082	MDH1;MDH1;WDPCP;WDPCP;MDH1	0.104158	0.0242324	0.0993594	0.0211165	0.645614	0.00355061	0.0835669	0.0192277	0.107468	0.0202691	0.568421	0.0124753
SD: Standard deviation, rho_brain_blood: Spearman's correlation cofficient, adj: adjusted by cell proportions

## Sheet: S_Table6
Supplementary Table 6 Differentially methylated positions (DMPs) associated with child maltreatment in Toddler Social Cognition cohort buccal samples.
probe	Chr	MAPINFO	UCSC_RefGene_Group	Relation_to_UCSC_CpG_Island	Gene_Name	t-value	P-value	FDR
cg18998253	1	99763500	Body;Body		LPPR4;LPPR4	6.15584	7.46823e-10	0.000612156
cg07571379	11	134631427		N_Shore		6.01217	1.8306e-09	0.000750252
cg10008731	10	116619335	Body;Body		FAM160B1;FAM160B1	5.80932	6.27288e-09	0.00171392
cg22918741	7	136322567				5.64727	1.63016e-08	0.00334053
cg24940561	15	33261489	Body;Body		FMN1;FMN1	5.56211	2.6653e-08	0.00436938
cg11113066	10	101281981		Island		5.52243	3.34347e-08	0.00456763
cg20981848	20	11899258	Body;Body		BTBD3;BTBD3	5.48738	4.07933e-08	0.00477678
cg26285502	15	36871420	TSS1500	N_Shore	C15orf41	-5.45253	4.96586e-08	0.00508803
cg02871659	16	2014063	TSS1500;TSS1500;TSS1500;Body	N_Shore	SNHG9;SNORA64;SNORA78;RPS2	-5.35047	8.77274e-08	0.00798982
cg11165820	17	32618881				5.30879	1.10358e-07	0.00904579
cg15051960	3	55521376	TSS200	Island	WNT5A	-5.24995	1.52144e-07	0.0113372
cg23743472	11	125649234	TSS1500		PATE2	5.22662	1.72634e-07	0.011792
cg22108941	6	51418312				5.17402	2.29116e-07	0.0144463
cg05978318	20	50036335	Body;Body;Body;Body;Body;Body;Body;Body		NFATC2;NFATC2;NFATC2;NFATC2;NFATC2;NFATC2;NFATC2;NFATC2	-5.14374	2.6932e-07	0.0152402
cg08692187	20	31720962				-5.13718	2.78893e-07	0.0152402
cg24446378	10	30589548				5.07608	3.85305e-07	0.0185037
cg11452329	6	85824216				5.04873	4.44746e-07	0.0185037
cg26886909	1	111859751	Body;Body		CHIA;CHIA	5.04247	4.59554e-07	0.0185037
cg26712547	1	100458552	5'UTR;5'UTR;Body		SLC35A3;SLC35A3;SLC35A3	5.04224	4.60124e-07	0.0185037
cg09303736	20	7704131				5.01976	5.17363e-07	0.0185037
cg13325542	8	140357381				5.0126	5.37e-07	0.0185037
cg13967168	10	133233686				5.01108	5.4126e-07	0.0185037
cg13275176	2	97534450	5'UTR	Island	SEMA4C	5.01089	5.41784e-07	0.0185037
cg15846886	17	79790116	5'UTR;5'UTR	N_Shore	FAM195B;FAM195B	-5.02947	4.91837e-07	0.0185037
cg22957360	10	101282572		N_Shore		4.99717	5.81781e-07	0.0186607
cg00911794	17	1962132	3'UTR;3'UTR	Island	HIC1;HIC1	4.98655	6.14677e-07	0.0186607
cg21231458	20	21485933		Island		-4.99044	6.02434e-07	0.0186607
cg26075184	10	101281703		Island		4.95263	7.32167e-07	0.0212318
cg13971906	13	43882850	Body;Body;Body		ENOX1;ENOX1;ENOX1	4.94104	7.77078e-07	0.0212318
cg09788492	10	101292477	TSS1500	Island	NKX2-3	-4.94336	7.67894e-07	0.0212318
cg17619655	15	33135886	Body;Body		FMN1;FMN1	4.92737	8.33452e-07	0.0220375
cg13356190	20	46705099				4.90704	9.24618e-07	0.0225426
cg02597696	20	20196086	Body		CFAP61	4.89802	9.68066e-07	0.0225426
cg08627849	22	17886802	5'UTR		CECR2	4.89349	9.90615e-07	0.0225426
cg04849386	10	64342383	Body;5'UTR		ZNF365;ZNF365	4.8857	1.03064e-06	0.0225426
cg03233624	17	55740464	Body		MSI2	4.88411	1.03895e-06	0.0225426
cg23068312	9	103477296				4.88296	1.04507e-06	0.0225426
cg20702314	17	41856518	TSS200;TSS1500	Island	DUSP3;C17orf105	-4.91014	9.10131e-07	0.0225426
cg25452067	10	101281603		Island		4.8683	1.12563e-06	0.0236578
cg10412136	7	4476540				4.8557	1.19963e-06	0.0240264
cg19223211	8	17579771	TSS200;5'UTR;Body;Body		MTUS1;MTUS1;MTUS1;MTUS1	4.85534	1.20179e-06	0.0240264
cg19302285	8	98505008				4.8379	1.31221e-06	0.0256094
cg10186605	17	29667326	Body;Body		NF1;NF1	4.81772	1.45209e-06	0.0265298
cg27168638	10	116622684	Body;3'UTR		FAM160B1;FAM160B1	4.81714	1.45631e-06	0.0265298
cg02842104	19	12251201	TSS200	Island	ZNF20	4.80919	1.51544e-06	0.0265298
cg02880119	16	3481970				4.80651	1.53588e-06	0.0265298
cg07844369	16	31813373				4.79604	1.6183e-06	0.0265298
cg14080155	2	45179727		Island		-4.80661	1.53508e-06	0.0265298
cg23257256	12	14538000	5'UTR;1stExon;5'UTR;5'UTR;5'UTR		ATF7IP;ATF7IP;ATF7IP;ATF7IP;ATF7IP	-4.80051	1.58266e-06	0.0265298
cg05378609	16	88709651		Island		-4.79702	1.6104e-06	0.0265298
cg04439077	6	55008889				4.79008	1.66716e-06	0.0267948
cg21777696	11	57283154	1stExon;5'UTR	Island	SLC43A1;SLC43A1	-4.78454	1.71381e-06	0.0270149
cg15457745	14	72399553	TSS1500	Island	RGS6	-4.76746	1.86565e-06	0.0288535
cg12136088	7	97501908	TSS200;TSS200;TSS1500	Island	ASNS;ASNS;ASNS	-4.76151	1.92151e-06	0.0291672
cg10831210	3	50150762	Body;Body		RBM5;RBM5	4.7393	2.14459e-06	0.0313906
cg00983437	20	592164	TSS1500	S_Shore	TCF15	-4.74247	2.11131e-06	0.0313906
cg06667589	16	50279907		Island		-4.72901	2.25616e-06	0.0324443
cg03472898	14	29240992	TSS1500;TSS1500	N_Shelf	C14orf23;C14orf23	-4.72546	2.29592e-06	0.0324469
cg25965286	14	91739097	Body	Island	CCDC88C	4.71963	2.36279e-06	0.0328259
cg08150745	X	113624821		N_Shore		4.71279	2.44352e-06	0.0330776
cg25214158	10	101289600		N_Shore		-4.71128	2.46161e-06	0.0330776
cg08038178	6	39905662		S_Shelf		4.70769	2.50545e-06	0.0331237
cg03664302	6	135407598				4.67915	2.88061e-06	0.0364913
cg08239499	7	38743613				4.67871	2.88691e-06	0.0364913
cg18664451	6	159961739				4.67822	2.89373e-06	0.0364913
cg14635303	2	1050113	Body	N_Shelf	SNTG2	4.66392	3.10237e-06	0.0367974
cg09417399	11	11971576	Body;Body		USP47;USP47	4.66219	3.1287e-06	0.0367974
cg02139344	4	155392829	Body		DCHS2	4.66128	3.14247e-06	0.0367974
cg23799025	1	13992541				-4.67086	2.99945e-06	0.0367974
cg10761001	13	48612261	Body;Body	Island	NUDT15;NUDT15	-4.66187	3.13344e-06	0.0367974
cg18834082	11	74811529				-4.65688	3.21034e-06	0.0370627
cg12205669	14	82086140				4.65367	3.2608e-06	0.0371224
cg09715466	9	113979011				4.65067	3.30863e-06	0.0371509
cg09181230	11	29207215				4.63607	3.55089e-06	0.0393323
cg08368905	1	10441146	3'UTR		KIF1B	4.62754	3.70027e-06	0.0395546
cg00238899	10	112046866	3'UTR;3'UTR;3'UTR		MXI1;MXI1;MXI1	4.62668	3.71572e-06	0.0395546
cg22383924	1	3590479	5'UTR		TP73	-4.63036	3.65034e-06	0.0395546
cg08918576	1	158688775	TSS1500		OR6K3	4.61897	3.85651e-06	0.0404659
cg00725401	8	70945169		N_Shore		-4.61664	3.90007e-06	0.0404659
cg04852949	1	32170929	TSS1500	S_Shore	COL16A1	-4.60641	4.09684e-06	0.0419762
cg25033767	6	43044876	Body;Body;Body;Body	Island	PTK7;PTK7;PTK7;PTK7	-4.60365	4.15145e-06	0.0420107
cg04748010	7	39046213	5'UTR;5'UTR		POU6F2;POU6F2	4.5965	4.29649e-06	0.0424307
cg01222603	11	10315914	TSS200	Island	SBF2	-4.59744	4.27712e-06	0.0424307
cg20233619	4	20689729				4.59173	4.39589e-06	0.0425601
cg23108232	14	59628483				4.58408	4.55982e-06	0.0425601
cg23621097	17	1962236	3'UTR;3'UTR	Island	HIC1;HIC1	4.58058	4.63697e-06	0.0425601
cg23091302	3	19389409	Body		KCNH8	4.57989	4.65217e-06	0.0425601
cg11345619	1	57444785				4.57861	4.68085e-06	0.0425601
cg03293447	1	42655931	Body;Body;Body;Body		FOXJ3;FOXJ3;FOXJ3;FOXJ3	4.57696	4.71773e-06	0.0425601
cg12811284	1	158688804	TSS1500		OR6K3	4.57435	4.7769e-06	0.0425601
cg04128488	18	8610485	Body	S_Shore	RAB12	-4.5796	4.65867e-06	0.0425601
cg18712199	14	29240691	TSS1500;TSS1500	N_Shelf	C14orf23;C14orf23	-4.57648	4.72869e-06	0.0425601
cg05295217	11	36476810	Body;Body;Body;Body		PRR5L;PRR5L;PRR5L;PRR5L	4.56869	4.90772e-06	0.0431445
cg12818107	8	142852265				4.56699	4.94776e-06	0.0431445
cg19396767	21	35685663				-4.56265	5.05121e-06	0.0435829
cg00703512	2	176867619	TSS1500;TSS1500;TSS1500;TSS1500;TSS1500;TSS200	S_Shore	KIAA1715;KIAA1715;KIAA1715;KIAA1715;KIAA1715;KIAA1715	-4.55992	5.11723e-06	0.0436926
cg08317694	15	78632144	TSS1500	N_Shore	CRABP1	4.5538	5.26861e-06	0.0440671
cg03955055	12	57916335	TSS1500	Island	MBD6	-4.55446	5.25193e-06	0.0440671
cg23285894	13	74826365				4.54997	5.36546e-06	0.0444239
Chr: chromosome, MAPINFO: hg19 position coordinate, FDR: Benjamini-Hochberg false discovery rate

## Sheet: S_Table7
Supplementary Table 7 Differentially methylated regions (DMRs) associated with child maltreatment in Toddler Social Cognition cohort buccal samples.
DMR	Chr	Start	End	Length	CpGs	Gene	Direction	P-value
DMR1	10	101280523	101283847	3325	18	NA	+	1.99925e-10
DMR2	7	96631384	96633766	2383	15	DLX6-AS1	-	2.5841e-07
DMR3	3	169377725	169379266	1542	10	MECOM	-	1.71963e-06
DMR4	7	96645989	96648043	2055	11	NA	-	1.52546e-05
DMR5	2	63281069	63284784	3716	20	OTX1	+	1.72097e-05
DMR6	6	10382088	10384104	2017	14	NA	+	2.02388e-05
DMR7	10	101289600	101291397	1798	8	RP11-129J12.2	-	2.18926e-05
DMR8	17	1961109	1962627	1519	8	HIC1	+	7.11807e-05
DMR9	3	169384034	169384681	648	5	NA	-	7.73203e-05
DMR10	15	59156878	59157857	980	6	ZNF444P1, RNF111, RP11-30K9.5	-	8.34701e-05
DMR11	7	96641205	96643686	2482	18	DLX6-AS1	-	8.93263e-05
DMR12	7	96626399	96627700	1302	10	DLX6-AS1	-	8.94846e-05
DMR13	1	99763134	99763500	367	2	LPPR4	+	0.0001341
DMR14	7	96654255	96655981	1727	18	DLX5	-	0.000152125
DMR15	6	85823362	85824216	855	5	NA	+	0.00024275
DMR16	11	120434391	120435978	1588	13	GRIK4	+	0.00033701
DMR17	3	169376298	169376618	321	3	MECOM	-	0.000350928
DMR18	20	11898851	11899859	1009	5	BTBD3, RP4-742J24.2	+	0.000465536
DMR19	16	88709302	88709927	626	4	CYBA	-	0.00047765
DMR20	4	109092312	109093243	932	8	LEF1-AS1	+	0.00052131
DMR21	6	50784944	50786511	1568	5	TFAP2B	-	0.000570926
DMR22	16	55364614	55366130	1517	9	IRX6, RP11-26L20.3	+	0.000635921
DMR23	7	96636116	96636746	631	6	DLX6, DLX6-AS1, DLX6-AS2	-	0.000684892
DMR24	7	96649956	96652245	2290	19	DLX5	-	0.000687764
DMR25	13	43321660	43321863	204	2	NA	+	0.000713012
DMR26	6	159961640	159961739	100	2	NA	+	0.000931533
DMR27	9	974533	975856	1324	6	NA	-	0.000958793
DMR28	19	37837067	37837190	124	3	HKR1	+	0.00108453
DMR29	7	19149989	19152418	2430	12	AC003986.6, TWIST1	-	0.00108789
DMR30	12	116806214	116806559	346	3	NA	+	0.00136731
DMR31	2	220107847	220108496	650	8	GLB1L	-	0.00138293
DMR32	17	36760878	36761029	152	3	SRCIN1	+	0.00141551
DMR33	8	17579494	17580136	643	7	MTUS1	+	0.00160889
DMR34	6	50811724	50813859	2136	10	TFAP2B	-	0.00177064
DMR35	7	19157839	19159569	1731	18	AC003986.7	-	0.00188219
DMR36	16	75273028	75273590	563	6	BCAR1	+	0.00202598
DMR37	1	50893149	50893984	836	6	NA	-	0.00219613
DMR38	3	35720302	35721758	1457	16	ARPP21	+	0.002228
DMR39	14	29240691	29240992	302	3	NA	-	0.00228191
DMR40	1	8271918	8272277	360	5	RP11-431K24.3	-	0.00245509
DMR41	15	68207809	68208151	343	3	NA	+	0.00275698
DMR42	2	162929318	162930376	1059	7	AC008063.2, DPP4	-	0.00312204
DMR43	14	52536436	52537013	578	7	NA	-	0.00326468
DMR44	7	157690564	157690769	206	5	PTPRN2	+	0.00331736
DMR45	15	78634088	78634553	466	3	CRABP1	+	0.00333218
DMR46	11	41481148	41481891	744	10	LRRC4C	-	0.00365965
DMR47	6	32068181	32068240	60	3	TNXB, ATF6B	-	0.00372245
DMR48	14	91738926	91739219	294	6	CCDC88C	+	0.00381957
DMR49	2	209029558	209029782	225	5	NA	+	0.00396169
DMR50	11	134306005	134306578	574	7	RP11-627G23.1	+	0.00400581
DMR51	7	96622204	96622709	506	4	DLX6-AS1	-	0.00402249
DMR52	7	2967973	2968685	713	8	CARD11	-	0.00407235
DMR53	6	30972498	30972851	354	3	NA	-	0.00408128
DMR54	5	3962083	3962477	395	5	NA	+	0.0041554
DMR55	10	19777254	19778008	755	6	MALRD1	-	0.00419668
DMR56	6	32060681	32061478	798	7	TNXB	+	0.00459109
DMR57	20	20195942	20196086	145	3	C20orf26	+	0.00463128
DMR58	9	100617710	100618115	406	4	FOXE1	+	0.00463584
DMR59	X	79277067	79277322	256	3	TBX22	+	0.00504686
DMR60	1	50880864	50881502	639	4	NA	-	0.00505844
DMR61	4	172735549	172735924	376	4	GALNTL6	+	0.00518551
DMR62	2	497035	497417	383	5	NA	+	0.00521979
DMR63	4	1202103	1203653	1551	20	SPON2	-	0.00554899
DMR64	16	2014063	2014270	208	2	RPS2, AC005363.9	-	0.00609905
DMR65	2	169658463	169659182	720	9	NOSTRIN	+	0.00637437
DMR66	17	70106973	70107185	213	2	SOX9-AS1	+	0.00850558
DMR67	6	167069326	167069389	64	2	RPS6KA2	+	0.00880164
DMR68	10	101292403	101293790	1388	12	NKX2-3	-	0.00908829
DMR69	5	4512196	4512554	359	5	RP11-445O3.1, RP11-445O3.2	+	0.00938276
DMR70	1	76262302	76262984	683	9	MSH4	+	0.00969339
DMR71	6	160680758	160680851	94	2	SLC22A2	-	0.0101188
DMR72	20	25731476	25731997	522	4	RP13-401N8.1	-	0.0110808
DMR73	3	71354948	71355161	214	3	FOXP1-AS1, FOXP1	+	0.0114372
DMR74	16	19896851	19897155	305	5	GPRC5B	-	0.0122355
DMR75	11	70001754	70002283	530	5	ANO1	+	0.013118
DMR76	5	50262673	50262995	323	5	CTD-2089N3.1	-	0.0147114
DMR77	9	19128182	19128206	25	2	PLIN2	-	0.0174011
DMR78	8	143545025	143545949	925	9	BAI1	+	0.0176127
DMR79	8	143867799	143868530	732	10	RP11-706C16.8, LY6D	-	0.0187612
DMR80	3	195954574	195954860	287	3	SLC51A, PCYT1A	-	0.0211654
DMR81	16	3481785	3482232	448	4	NAA60	+	0.0214643
DMR82	2	66809780	66809985	206	4	AC007392.3	+	0.0222861
DMR83	10	63213104	63213784	681	9	RP11-809M12.1, TMEM26	-	0.0253333
DMR84	13	39261734	39261796	63	2	FREM2	-	0.0258332
DMR85	10	101295724	101296619	896	5	NKX2-3	-	0.0290195
DMR86	4	109087499	109088237	739	7	LEF1	-	0.0300146
DMR87	9	96108319	96109145	827	7	C9orf129	-	0.0319586
DMR88	8	37797731	37797828	98	4	NA	+	0.0325233
DMR89	6	50817157	50817450	294	5	NA	-	0.0345953
DMR90	3	168866525	168866814	290	4	MECOM	-	0.0390096
DMR91	15	78631277	78632572	1296	13	NA	+	0.0392374
DMR92	21	39643626	39644354	729	10	KCNJ15	+	0.0407789
DMR93	17	48042353	48043063	711	6	NA	+	0.0428831
DMR94	11	8290295	8290939	645	9	NA	-	0.0436768
DMR95	12	3862221	3862225	5	2	EFCAB4B	-	0.0444685
DMR96	12	122710972	122711476	505	7	DIABLO, RP11-512M8.5	-	0.045824
DMR97	3	130745160	130745959	800	19	NEK11, ASTE1	-	0.0498756
Chr: chromosome, Start/End: start and end position of DMR (hg19), Length: Length of DMR (bp), CpGs: the number of CpGs measured within the DMR, Gene: genes that span the DMR, Direction: direction of the relation between group (CM/TD) and DNA methylation levels (+: increased methylation in CM; -: decreased methylation in CM), p-value: Stouffer p value of the DMR.

## Sheet: S_Table8
Supplementary Table 8 Brain-Buccal correlations of DMPs associated with child maltreatment in Toddler Social Cognition cohort buccal samples.
probe	Gene_Name	brain_mean	brain_sd	buccal_mean	buccal_sd	rho_brain_buccal	p_rho_brain_buccal	brain_mean_adj	brain_sd_adj	buccal_mean_adj	buccal_sd_adj	rho_brain_buccal_adj	p_rho_brain_buccal_adj
cg18998253	LPPR4;LPPR4	0.846086	0.0790355	0.84427	0.0505574	-0.166667	0.493714	0.958276	0.0194888	0.910416	0.0273299	0.0754386	0.759165
cg07571379		0.967024	0.00847914	0.944421	0.0162137	-0.338596	0.156296	0.978104	0.00451584	0.96719	0.00869847	0.117544	0.630941
cg10008731	FAM160B1;FAM160B1	0.670695	0.133805	0.756569	0.0835354	0.182456	0.453041	0.880553	0.0481786	0.865659	0.0476432	0.412281	0.0806616
cg22918741		0.632542	0.119871	0.700525	0.0963492	0.245614	0.309401	0.762741	0.088065	0.890372	0.0285825	0.0789474	0.748184
cg24940561	FMN1;FMN1	0.914215	0.0871578	0.951221	0.00978479	0.0421053	0.865481	0.908573	0.0879148	0.948609	0.0103354	-0.00526316	0.985626
cg11113066		0.262715	0.138997	0.596996	0.0961015	-0.398246	0.0923372	0.310077	0.140549	0.777717	0.0504336	-0.363158	0.126993
cg20981848	BTBD3;BTBD3	0.355014	0.178537	0.222598	0.0421416	-0.108772	0.656954	0.47608	0.168924	0.239091	0.0436611	-0.0877193	0.720942
cg26285502	C15orf41	0.0341054	0.0104349	0.0381175	0.0102195	0.0333333	0.893922	0.048387	0.0109255	0.0348378	0.00924974	-0.161404	0.507666
cg02871659	SNHG9;SNORA64;SNORA78;RPS2	0.283863	0.0798859	0.111744	0.0667921	0.0192982	0.93968	0.291014	0.0806751	0.333312	0.0685937	0.1	0.683361
cg11165820		0.971575	0.00835275	0.788646	0.117793	0.103509	0.672752	0.967438	0.00920463	0.96225	0.0141011	0.205263	0.397559
cg15051960	WNT5A	0.0422208	0.00873522	0.0414418	0.0107299	-0.231579	0.338581	0.0462582	0.00920175	0.0643436	0.0123735	-0.233333	0.334846
cg23743472	PATE2	0.930824	0.026432	0.931477	0.0176504	0.157895	0.517074	0.926347	0.0278525	0.945203	0.0129894	0.166667	0.493714
cg22108941		0.751712	0.0974829	0.866398	0.0431072	0.403509	0.0878198	0.71251	0.103856	0.900375	0.0308095	0.364912	0.125064
cg05978318	NFATC2;NFATC2;NFATC2;NFATC2;NFATC2;NFATC2;NFATC2;NFATC2	0.645367	0.0682289	0.733827	0.0744776	-0.0789474	0.748184	0.641844	0.0684492	0.523021	0.049553	0.0385965	0.87684
cg08692187		0.611036	0.141671	0.255843	0.160408	0.242105	0.316546	0.435758	0.10773	0.769299	0.0623469	-0.00877193	0.97413
cg24446378		0.956995	0.0151244	0.89606	0.0457876	0.205263	0.397559	0.96268	0.0129249	0.975268	0.00556936	0.354386	0.13696
cg11452329		0.197264	0.09286	0.890323	0.0418451	-0.00350877	0.991375	0.114498	0.0628366	0.922009	0.0280243	-0.0280702	0.91105
cg26886909	CHIA;CHIA	0.969465	0.00660088	0.944267	0.018514	-0.373684	0.115738	0.970247	0.00640705	0.970885	0.00717982	-0.301754	0.208723
cg26712547	SLC35A3;SLC35A3;SLC35A3	0.918131	0.169308	0.820399	0.0807225	-0.173684	0.475415	0.900744	0.177387	0.957224	0.0183267	-0.0298246	0.905336
cg09303736		0.897846	0.198786	0.313057	0.25783	0.0842105	0.731801	0.875561	0.200688	0.957313	0.0168893	-0.054386	0.825943
cg13325542		0.955927	0.012707	0.9181	0.0295215	0.0701754	0.775723	0.963492	0.0104174	0.962753	0.00985619	-0.14386	0.555527
cg13967168		0.945449	0.0230731	0.836073	0.0777835	0.00701754	0.979878	0.947931	0.0226309	0.939395	0.0268179	0.157895	0.517074
cg13275176	SEMA4C	0.0478575	0.0118687	0.0531149	0.0158038	0.554386	0.0152372	0.0419842	0.0104003	0.0483277	0.014223	0.498246	0.0316174
cg15846886	FAM195B;FAM195B	0.0815547	0.02699	0.0888059	0.0437254	0.201754	0.405836	0.0754243	0.02515	0.0258883	0.00933696	0.154386	0.526565
cg22957360		0.116149	0.0941086	0.560096	0.12155	0.0350877	0.888222	0.17087	0.110169	0.731235	0.0884482	-0.0438596	0.859811
cg00911794	HIC1;HIC1	0.467956	0.0903247	0.562161	0.112119	-0.12807	0.600284	0.507344	0.0892416	0.278755	0.0420315	0.108772	0.656954
cg21231458		0.10816	0.151839	0.121185	0.0466792	0.221053	0.36151	0.152465	0.151549	0.0519542	0.0161565	0.240351	0.320156
cg26075184		0.167218	0.199096	0.724169	0.167779	-0.184211	0.448633	0.256266	0.192259	0.95698	0.0295773	-0.0122807	0.962639
cg13971906	ENOX1;ENOX1;ENOX1	0.970428	0.00641511	0.916454	0.0275215	-0.319298	0.182451	0.968406	0.00678908	0.961828	0.00828955	0.0842105	0.731801
cg09788492	NKX2-3	0.121973	0.142938	0.0904517	0.0611147	0.277193	0.24962	0.0992594	0.135406	0.0183652	0.0129817	0.3	0.211484
cg17619655	FMN1;FMN1	0.401328	0.146515	0.0331488	0.00892257	-0.454386	0.0522534	0.224138	0.124027	0.0295381	0.00780817	-0.564912	0.0131243
cg13356190		0.953128	0.08112	0.391305	0.279846	0.25614	0.288569	0.946904	0.0872512	0.961777	0.0339165	0.0368421	0.882528
cg02597696	CFAP61	0.673181	0.142231	0.690301	0.141954	-0.0105263	0.968384	0.603588	0.137054	0.943821	0.0167488	-0.150877	0.536138
cg08627849	CECR2	0.769952	0.0752814	0.533163	0.180721	-0.270175	0.262201	0.757909	0.0770297	0.883429	0.0716288	-0.0807018	0.742711
cg04849386	ZNF365;ZNF365	0.923348	0.0344498	0.858966	0.0654786	-0.203509	0.401686	0.962553	0.018751	0.975481	0.00516907	-0.0578947	0.814718
cg03233624	MSI2	0.0966871	0.0770263	0.334158	0.194401	-0.154386	0.526565	0.0890115	0.0739806	0.849545	0.0548151	-0.0859649	0.726365
cg23068312		NA	NA	NA	NA	NA	NA	NA	NA	NA	NA	NA	NA
cg20702314	DUSP3;C17orf105	0.0429959	0.00437928	0.0451141	0.00402045	0.215789	0.373308	0.0404609	0.00402446	0.0455847	0.00404696	0.245614	0.309401
cg25452067		0.0731117	0.0436727	0.454132	0.0563812	-0.161404	0.507666	0.0817118	0.0463426	0.493413	0.0553442	-0.217544	0.369351
cg10412136		0.806081	0.139082	0.486366	0.169891	-0.077193	0.753669	0.619101	0.133005	0.88807	0.0200846	-0.131579	0.590207
cg19223211	MTUS1;MTUS1;MTUS1;MTUS1	0.218738	0.119959	0.309515	0.182379	0.0263158	0.916769	0.149265	0.104336	0.834691	0.0724372	-0.245614	0.309401
cg19302285		0.810636	0.0770058	0.766955	0.0943402	0.331579	0.165481	0.861458	0.0657304	0.943595	0.0167565	0.236842	0.327451
cg10186605	NF1;NF1	0.422136	0.0939797	0.334537	0.213995	0.166667	0.493714	0.511139	0.087218	0.889281	0.0327014	0.131579	0.590207
cg27168638	FAM160B1;FAM160B1	0.96807	0.0185898	0.676178	0.120856	0.291228	0.225656	0.96851	0.0184407	0.934576	0.0152582	-0.0912281	0.710136
cg02842104	ZNF20	0.0912692	0.0260311	0.0940166	0.0241855	0.210526	0.385324	0.0668733	0.0178025	0.0995524	0.0254746	0.401754	0.0893068
cg02880119		0.626107	0.0790806	0.631776	0.0638754	0.814035	2.19525e-05	0.593842	0.080803	0.582268	0.0648413	0.659649	0.00272906
cg07844369		0.891335	0.038362	0.958346	0.0150286	-0.0929825	0.704753	0.887084	0.039585	0.970258	0.0101973	-0.178947	0.461923
cg14080155		0.0839066	0.0814131	0.0635328	0.0158886	0.361404	0.128943	0.0597566	0.0675782	0.0485164	0.0112024	0.447368	0.0563498
cg23257256	ATF7IP;ATF7IP;ATF7IP;ATF7IP;ATF7IP	NA	NA	NA	NA	NA	NA	NA	NA	NA	NA	NA	NA
cg05378609		0.964468	0.0558716	0.597907	0.128433	-0.394737	0.0954438	0.95021	0.0620423	0.861239	0.0310478	0.0491228	0.842843
cg04439077		0.956141	0.0331714	0.823007	0.0686415	0.508772	0.0277917	0.9384	0.0351543	0.940541	0.0165727	0.287719	0.231498
cg21777696	SLC43A1;SLC43A1	0.0590465	0.0149014	0.0481532	0.00831542	-0.189474	0.43555	0.0663828	0.0158991	0.0493578	0.00849272	-0.0385965	0.87684
cg15457745	RGS6	0.0429504	0.0114569	0.0512251	0.0142559	0.0333333	0.893922	0.0476386	0.0119438	0.0468666	0.013013	0.0631579	0.797947
cg12136088	ASNS;ASNS;ASNS	0.0212736	0.00545084	0.0164626	0.00319663	0.103509	0.672752	0.0197818	0.00498274	0.0171171	0.00334767	0.105263	0.667471
cg10831210	RBM5;RBM5	0.916046	0.097488	0.905286	0.0378976	-0.121053	0.620653	0.857822	0.112039	0.957346	0.0165234	-0.00350877	0.991375
cg00983437	TCF15	0.496212	0.0661532	0.138731	0.0428201	-0.170175	0.484521	0.472133	0.0656061	0.0682656	0.0163999	0.184211	0.448633
cg06667589		0.014059	0.0014638	0.0146278	0.00171015	0.826316	6.37252e-06	0.0133816	0.00137898	0.0141834	0.00164451	0.72807	0.000601715
cg03472898	C14orf23;C14orf23	0.284236	0.245961	0.169652	0.0703066	-0.215789	0.373308	0.791366	0.0972951	0.0705683	0.0272578	0.14386	0.555527
cg25965286	CCDC88C	0.913069	0.0405575	0.729503	0.0749312	0.15614	0.521809	0.915806	0.0396007	0.863691	0.036215	0.452632	0.0532552
cg08150745		0.971385	0.0101824	0.972565	0.0066949	0.112281	0.6465	0.975079	0.00892504	0.964328	0.00769623	0.278947	0.246537
cg25214158		0.314451	0.156276	0.1541	0.0818342	-0.0421053	0.865481	0.442425	0.13812	0.107569	0.0579958	-0.187719	0.439888
cg08038178		0.647541	0.128886	0.638628	0.131034	0.345614	0.147478	0.538411	0.12844	0.853503	0.0506744	0.345614	0.147478
cg03664302		0.909217	0.0769428	0.873926	0.0536621	0.150877	0.536138	0.923479	0.0701653	0.951777	0.0180073	-0.00526316	0.985626
cg08239499		0.84689	0.0934736	0.62493	0.12729	-0.180702	0.457471	0.682502	0.0854766	0.901133	0.0264426	-0.340351	0.154058
cg18664451		0.790405	0.12648	0.368463	0.206468	0.0877193	0.720942	0.546018	0.103937	0.898106	0.0260153	0.261404	0.278493
cg14635303	SNTG2	0.662385	0.140818	0.823272	0.0557908	-0.340351	0.154058	0.453692	0.108697	0.912081	0.0244641	-0.331579	0.165481
cg09417399	USP47;USP47	NA	NA	NA	NA	NA	NA	NA	NA	NA	NA	NA	NA
cg02139344	DCHS2	0.667864	0.163336	0.696231	0.105775	0.0929825	0.704753	0.484963	0.13241	0.910123	0.0205948	-0.0964912	0.694028
cg23799025		0.519889	0.0923645	0.33552	0.149863	0.233333	0.334846	0.572912	0.0928065	0.754089	0.0927673	-0.0719298	0.770193
cg10761001	NUDT15;NUDT15	0.0197596	0.00464618	0.0192385	0.00279499	0.408772	0.0834701	0.0195267	0.00457891	0.0215487	0.00291355	0.340351	0.154058
cg18834082		0.490767	0.152628	0.0525747	0.020836	-0.0508772	0.837202	0.269113	0.0949114	0.052582	0.0208389	-0.115789	0.636111
cg12205669		0.692065	0.112844	0.603901	0.128999	0.14386	0.555527	0.746407	0.10538	0.901745	0.0181895	0.487719	0.0358489
cg09715466		0.871579	0.133452	0.88012	0.0224015	-0.442105	0.0595814	0.796072	0.132579	0.908379	0.0152341	-0.0736842	0.764673
cg09181230		0.896949	0.175371	0.792102	0.0664625	-0.00701754	0.979878	0.882006	0.180285	0.932783	0.0156898	-0.347368	0.14533
cg08368905	KIF1B	0.324997	0.109533	0.598247	0.122988	-0.124561	0.610433	0.207013	0.0812128	0.839526	0.046985	0.0719298	0.770193
cg00238899	MXI1;MXI1;MXI1	0.832583	0.0792758	0.71182	0.140742	-0.0385965	0.87684	0.79827	0.0843047	0.951223	0.0238192	0.126316	0.60535
cg22383924	TP73	0.721296	0.0409139	0.55972	0.0820014	-0.0684211	0.781263	0.696099	0.0412594	0.697596	0.0554953	0.182456	0.453041
cg08918576	OR6K3	0.733526	0.17418	0.837685	0.0703168	-0.0859649	0.726365	0.491202	0.173568	0.964418	0.00748559	-0.245614	0.309401
cg00725401		0.367354	0.0941988	0.528097	0.136573	-0.0877193	0.720942	0.247888	0.0619142	0.232145	0.0638441	0.119298	0.625788
cg04852949	COL16A1	0.474891	0.170422	0.055736	0.0260933	0.168421	0.489107	0.347571	0.147736	0.0483897	0.0226245	0.0263158	0.916769
cg25033767	PTK7;PTK7;PTK7;PTK7	0.187966	0.0466498	0.0949592	0.0158165	-0.377193	0.112153	0.211876	0.048413	0.10728	0.0175268	-0.249123	0.302357
cg04748010	POU6F2;POU6F2	0.841568	0.0636294	0.800216	0.077236	0.163158	0.502994	0.889449	0.0485004	0.950405	0.00894821	-0.207018	0.393457
cg01222603	SBF2	0.017706	0.00268615	0.0180952	0.00159625	0.335088	0.160842	0.0172285	0.00257776	0.0204279	0.00151859	0.187719	0.439888
cg20233619		0.818821	0.160152	0.650995	0.0819429	-0.0578947	0.814718	0.791641	0.160296	0.833874	0.0213447	-0.0280702	0.91105
cg23108232		0.55137	0.148208	0.0873054	0.0330052	-0.275439	0.252728	0.617346	0.138492	0.164897	0.0367129	-0.394737	0.0954438
cg23621097	HIC1;HIC1	0.387802	0.0779508	0.510781	0.0778938	0.114035	0.641297	0.433875	0.0767669	0.323814	0.036018	0.0842105	0.731801
cg23091302	KCNH8	0.678993	0.116985	0.309243	0.108638	-0.308772	0.197925	0.669859	0.117396	0.104354	0.0329869	-0.245614	0.309401
cg11345619		0.968642	0.0191893	0.787483	0.0699351	0.363158	0.126993	0.954872	0.0248724	0.915489	0.0230848	0.0666667	0.786815
cg03293447	FOXJ3;FOXJ3;FOXJ3;FOXJ3	0.928678	0.171854	0.569293	0.181295	-0.280702	0.24348	0.903009	0.183303	0.946322	0.0157919	0.0666667	0.786815
cg12811284	OR6K3	0.460217	0.161462	0.620882	0.124267	-0.0421053	0.865481	0.198974	0.0752314	0.90818	0.0153567	0.142105	0.560424
cg04128488	RAB12	0.0453108	0.0467565	0.0367912	0.00899068	0.201754	0.405836	0.0777628	0.0488701	0.0451245	0.0104747	-0.0263158	0.916769
cg18712199	C14orf23;C14orf23	0.309026	0.254093	0.0926197	0.0449281	-0.212281	0.381295	0.820964	0.096654	0.045608	0.0212363	-0.119298	0.625788
cg05295217	PRR5L;PRR5L;PRR5L;PRR5L	0.485469	0.0908289	0.753783	0.0663013	-0.133333	0.585196	0.32816	0.0526424	0.86056	0.031496	-0.447368	0.0563498
cg12818107		0.815412	0.0672879	0.926406	0.0209679	0.189474	0.43555	0.882739	0.043356	0.898106	0.0241862	0.0912281	0.710136
cg19396767		0.722972	0.0747279	0.484169	0.0610173	-0.207018	0.393457	0.7685	0.0685087	0.543536	0.0564016	-0.352632	0.139019
cg00703512	KIAA1715;KIAA1715;KIAA1715;KIAA1715;KIAA1715;KIAA1715	0.0443073	0.0208685	0.0709032	0.0322141	0.536842	0.0193634	0.0483376	0.0220527	0.0574733	0.0256695	0.508772	0.0277917
cg08317694	CRABP1	0.473079	0.130144	0.778818	0.148732	0.4	0.0908126	0.389225	0.133582	0.260714	0.105434	0.268421	0.265409
cg03955055	MBD6	0.0249445	0.00707126	0.0259049	0.0045582	0.433333	0.065282	0.0210046	0.00583133	0.0265714	0.00466563	0.345614	0.147478
cg23285894		0.967779	0.00815339	0.94382	0.0122736	0.375439	0.113935	0.961024	0.0092461	0.945675	0.0117917	0.277193	0.24962
SD: Standard deviation, rho_brain_blood: Spearman's correlation cofficient, adj: adjusted by cell proportions

## Sheet: S_Table9
Supplementary Table 9 Top signals (P-values < 5.0E-05) for the association between DNA methylation and maltreatment type across all domains as well as in the single domains in Toddler Social Cognition cohort.
Gene	Chr	Pos (lower)	Pos (upper)	Meandistgene	Maxdistgene	#CpG sites	P-value (group)	Maltreatment domains
								P-value (across all domains)	P-value (PA)	P-value (EA)	P-value (SA)	P-value (NG)
NKX2-3	10	101292403	101315115	2822.9	18837	37	7.43e-06	0.007	0.63	0.02	NA	0.01
RP11-394D2.1	9	103477296	103493536	8120	16225	2	8.87e-06	0.003	0.89	0.008	NA	0.01
OR6K3	1	158687431	158689263	886	1310	5	1.02e-05	0.004	0.37	0.006	NA	0.03
GSTM3P1	20	21483913	21485933	2556.3	3327	3	1.06e-05	0.004	0.3	0.08	NA	0.002
DEFB116	20	29892486	29896981	464.6	1472	7	1.21e-05	0.004	0.49	0.04	NA	0.003
RP11-129J12.2	10	101277257	101291397	3153.8	8849	36	1.25e-05	0.01	0.51	0.03	NA	0.01
RP4-742J24.2	20	11893283	11899258	1649.5	3232	2	1.56e-05	0.01	0.82	0.07	NA	0.005
AC003986.7	7	19158566	19160621	653.3	989	12	2.46e-05	0.005	0.37	0.03	NA	0.007
LPPR4	1	99726533	99792742	4392	17596	25	2.9e-05	0.005	0.86	0.005	NA	0.05
RP3-393E18.1	6	159946309	159961739	9681.7	14180	3	3.01e-05	0.04	0.19	0.34	NA	0.01
POM121C	7	75047781	75116350	1284.4	5120	9	3.66e-05	0.004	0.78	0.05	NA	0.002
CCL11	17	32611290	32627486	2042.5	12133	10	4.03e-05	0.001	0.48	0.004	NA	0.01
NTNG2	9	135018611	135120707	5990.5	18993	52	4.23e-05	0.002	0.64	0.09	NA	0.0003
RP5-912I13.1	7	155191471	155202943	2305.7	8466	13	0.03	1.83e-05	0.0002	0.0007	NA	0.005
RNU7-114P	12	114024370	114049984	9000.4	16225	14	0.01	2.57e-05	0.004	9.35e-06	NA	0.95
Adjusted for age, sex, IQ/DQ, days after sampling, and buccal epithelium, Suggestive: P-value < 5 x 10-5 (underlined), Chr: chromosome, pos (lower)/(upper): lower and upper position of the gene (hg19), Mean/Maxdistgene: mean and maximum distance (bp) from nearest gene, #CpG sites: the number of CpGs measured within the gene, PA: physical abuse; EA: emotional abuse; SA: sexual abuse; NG: neglect

## Sheet: S_Table10
Supplementary Table 10 Identification of lead signals and direction of associations in Toddler Social Cognition cohort.
Gene	Chr	Pos	CpG sites	group		PA		EA		SA		NG
				beta	P-value	beta	P-value	beta	P-value	beta	P-value	beta	P-value
NKX2-3	10	101292403	cg02030034	-0.6	4.44e-05	0.06	0.96	-0.28	0.05	NA	NA	-0.42	0.002
NKX2-3	10	101292477	cg09788492	-0.74	7.68e-07	-0.19	0.37	-0.53	0.0002	NA	NA	-0.48	0.0008
NKX2-3	10	101292507	cg06854084	-0.62	2.38e-05	0.1	0.85	-0.32	0.03	NA	NA	-0.43	0.002
NKX2-3	10	101293083	cg17042009	-0.26	0.0008	-0.09	0.38	-0.23	0.0009	NA	NA	-0.11	0.11
NKX2-3	10	101293172	cg17811778	-0.44	0.0002	0.1	0.76	-0.09	0.38	NA	NA	-0.33	0.002
NKX2-3	10	101294300	cg22778788	-0.42	0.0004	0.15	0.56	0.09	0.35	NA	NA	-0.19	0.09
NKX2-3	10	101296069	cg24913868	-0.41	0.0002	0.04	0.97	-0.18	0.09	NA	NA	-0.27	0.008
NKX2-3	10	101296221	cg16363784	-0.55	0.0001	0.13	0.7	-0.27	0.05	NA	NA	-0.31	0.02
	10	101297605	cg15903032	0.25	0.0006	-0.12	0.21	0.1	0.18	NA	NA	0.12	0.07
	10	101298812	cg19489503	0.46	0.0007	-0.24	0.19	0.34	0.01	NA	NA	0.15	0.24
	10	101307763	cg12683832	0.3	0.001	0.11	0.58	0.23	0.01	NA	NA	0.27	0.0008
RP11-394D2.1	9	103477296	cg23068312	0.72	1.05e-06	-0.03	0.77	0.41	0.009	NA	NA	0.45	0.002
OR6K3	1	158688775	cg08918576	0.45	3.86e-06	0.13	0.57	0.33	0.0007	NA	NA	0.26	0.006
OR6K3	1	158688804	cg12811284	0.36	4.78e-06	-0.05	0.56	0.13	0.12	NA	NA	0.17	0.03
GSTM3P1	20	21485933	cg21231458	-0.53	6.02e-07	0.18	0.44	-0.21	0.05	NA	NA	-0.4	4.93e-05
DEFB116	20	29892486	cg13700506	0.36	2.11e-05	0.09	0.64	0.18	0.039	NA	NA	0.2	0.01
DEFB116	20	29896479	cg11484348	0.49	0.0006	0.2	0.49	0.22	0.14	NA	NA	0.41	0.001
RP11-129J12.2	10	101279697	cg22891862	0.45	4.26e-05	-0.1	0.46	0.26	0.02	NA	NA	0.25	0.02
RP11-129J12.2	10	101280750	cg00674004	0.57	0.0001	-0.25	0.22	0.27	0.09	NA	NA	0.33	0.02
RP11-129J12.2	10	101281203	cg10506844	0.68	3.94e-05	-0.21	0.34	0.36	0.04	NA	NA	0.38	0.01
RP11-129J12.2	10	101281603	cg25452067	0.39	1.13e-06	-0.04	0.65	0.22	0.01	NA	NA	0.21	0.009
RP11-129J12.2	10	101281703	cg26075184	1.11	7.32e-07	-0.21	0.47	0.52	0.03	NA	NA	0.73	0.0008
RP11-129J12.2	10	101281924	cg02792168	0.8	0.0004	-0.36	0.24	0.17	0.51	NA	NA	0.55	0.008
RP11-129J12.2	10	101281981	cg11113066	0.54	3.34e-08	-0.06	0.59	0.29	0.005	NA	NA	0.31	0.001
RP11-129J12.2	10	101282185	cg19960420	0.81	1.52e-05	-0.03	0.79	0.59	0.001	NA	NA	0.47	0.009
RP11-129J12.2	10	101282572	cg22957360	0.69	5.82e-07	-0.04	0.74	0.41	0.005	NA	NA	0.35	0.01
RP11-129J12.2	10	101282726	cg01987516	0.61	4.31e-05	-0.18	0.37	0.23	0.16	NA	NA	0.35	0.01
RP11-129J12.2	10	101282759	cg23904955	0.37	0.0002	-0.12	0.35	0.15	0.15	NA	NA	0.21	0.02
RP11-129J12.2	10	101283847	cg11081894	0.75	9.22e-06	-0.21	0.36	0.37	0.04	NA	NA	0.45	0.005
RP11-129J12.2	10	101284535	cg11232245	0.55	0.0002	-0.32	0.12	0.3	0.04	NA	NA	0.26	0.06
RP11-129J12.2	10	101289600	cg25214158	-0.72	2.46e-06	0.17	0.64	-0.24	0.12	NA	NA	-0.46	0.001
RP11-129J12.2	10	101290168	cg02798576	-0.66	0.0001	0.26	0.46	-0.27	0.1	NA	NA	-0.43	0.005
RP11-129J12.2	10	101291092	cg04190875	-0.2	0.0007	-0.07	0.34	-0.14	0.009	NA	NA	-0.15	0.006
RP11-129J12.2	10	101291128	cg00924482	-0.48	0.0001	0.14	0.61	-0.21	0.08	NA	NA	-0.33	0.004
RP11-129J12.2	10	101291397	cg03609639	-0.5	9.76e-05	0.19	0.47	-0.26	0.04	NA	NA	-0.28	0.02
RP4-742J24.2	20	11899258	cg20981848	0.6	4.08e-08	-0.08	0.56	0.26	0.04	NA	NA	0.41	0.0001
AC003986.7	7	19158647	cg14391419	-0.64	2.16e-05	0.003	0.86	-0.26	0.08	NA	NA	-0.45	0.001
AC003986.7	7	19158664	cg10126205	-0.58	0.0005	-0.14	0.5	-0.35	0.02	NA	NA	-0.37	0.02
AC003986.7	7	19158721	cg12307484	-0.39	5.79e-05	-0.15	0.27	-0.25	0.008	NA	NA	-0.3	0.0007
AC003986.7	7	19158747	cg10624122	-0.26	0.0002	-0.13	0.2	-0.18	0.007	NA	NA	-0.19	0.003
AC003986.7	7	19159452	cg14934481	-0.39	0.0001	0.09	0.78	-0.27	0.004	NA	NA	-0.19	0.05
LPPR4	1	99729504	cg15728779	-0.13	0.001	-0.06	0.28	-0.09	0.02	NA	NA	-0.11	0.002
LPPR4	1	99730221	cg11956761	-0.38	0.0005	-0.17	0.25	-0.27	0.008	NA	NA	-0.25	0.01
LPPR4	1	99763134	cg08271203	0.53	0.0002	-0.08	0.6	0.39	0.006	NA	NA	0.26	0.05
LPPR4	1	99763500	cg18998253	0.61	7.47e-10	-0.05	0.64	0.33	0.003	NA	NA	0.41	4.25e-05
RP3-393E18.1	6	159961640	cg23990240	0.5	5.8e-05	-0.3	0.1	0.04	0.84	NA	NA	0.29	0.014
RP3-393E18.1	6	159961739	cg18664451	0.56	2.89e-06	-0.2	0.24	0.18	0.19	NA	NA	0.36	0.001
POM121C	7	75051188	cg23472171	0.53	2.91e-05	0.13	0.67	0.26	0.05	NA	NA	0.43	0.0002
CCL11	17	32618881	cg11165820	0.62	1.1e-07	0.21	0.4	0.41	0.0009	NA	NA	0.43	0.0001
NTNG2	9	135114066	cg13672736	2.09	4.51e-05	0.5	0.69	0.85	0.12	NA	NA	1.96	1.37e-05
RP5-912I13.1	7	155191709	cg14170201	-0.76	0.03	-1.99	2.84e-05	-1.11	0.0003	NA	NA	-1.07	0.0004
RP5-912I13.1	7	155191709	cg01803724	-0.19	0.07	-0.19	0.17	-0.35	0.0001	NA	NA	-0.08	0.37
RNU7-114P	12	114030510	cg04385200	-0.47	0.02	-0.8	0.004	-0.83	3.39e-07	NA	NA	-0.02	0.91
Only CpG sites with a P-value < 0.001 for at least one maltreatment domain are shown, beta: regression coefficient, PA: physical abuse; EA: emotional abuse; SA: sexual abuse; NG: neglect

## Sheet: S_Table11
Supplementary Table 11 Associations between methylation level of DMPs found in Toddler Social Cognition cohort and psychosocial aspects.
probe	Gene_Name	SDQ
		r	P-value
cg18998253	LPPR4;LPPR4	-0.154189	0.186566
cg07571379		0.00630637	0.957176
cg10008731	FAM160B1;FAM160B1	-0.0906183	0.439411
cg22918741		-0.00611442	0.958478
cg24940561	FMN1;FMN1	-0.0217335	0.853168
cg11113066		-0.0429967	0.714158
cg20981848	BTBD3;BTBD3	-0.0677038	0.56384
cg26285502	C15orf41	0.0392354	0.738221
cg02871659	SNHG9;SNORA64;SNORA78;RPS2	-0.00253313	0.982792
cg11165820		-0.109726	0.348692
cg15051960	WNT5A	0.139645	0.23212
cg23743472	PATE2	-0.0105651	0.928317
cg22108941		-0.0971878	0.406821
cg05978318	NFATC2;NFATC2;NFATC2;NFATC2;NFATC2;NFATC2;NFATC2;NFATC2	-0.102824	0.380024
cg08692187		0.0576413	0.623276
cg24446378		-0.0900346	0.442375
cg11452329		0.117039	0.317306
cg26886909	CHIA;CHIA	-0.0440661	0.707366
cg26712547	SLC35A3;SLC35A3;SLC35A3	-0.0479037	0.683182
cg09303736		-0.131055	0.262394
cg13325542		-0.0586748	0.61705
cg13967168		-0.042143	0.719596
cg13275176	SEMA4C	-0.0521993	0.656486
cg15846886	FAM195B;FAM195B	0.0433287	0.712047
cg22957360		-0.0135838	0.907915
cg00911794	HIC1;HIC1	0.0119491	0.918957
cg21231458		0.0705919	0.547289
cg26075184		-0.0115718	0.921508
cg13971906	ENOX1;ENOX1;ENOX1	-0.200272	0.0849291
cg09788492	NKX2-3	-0.0867131	0.459458
cg17619655	FMN1;FMN1	-0.146819	0.208768
cg13356190		0.021657	0.853679
cg02597696	CFAP61	-0.0325666	0.781495
cg08627849	CECR2	-0.125213	0.284447
cg04849386	ZNF365;ZNF365	-0.0804239	0.492772
cg03233624	MSI2	-0.0118859	0.919384
cg23068312		-0.0849831	0.468497
cg20702314	DUSP3;C17orf105	-0.118069	0.31304
cg25452067		0.0666774	0.569778
cg10412136		0.0146033	0.901037
cg19223211	MTUS1;MTUS1;MTUS1;MTUS1	-0.042749	0.715734
cg19302285		0.0324044	0.782556
cg10186605	NF1;NF1	-0.159296	0.17222
cg27168638	FAM160B1;FAM160B1	-0.291221	0.0112483
cg02842104	ZNF20	-0.0682722	0.560564
cg02880119		-0.14234	0.223143
cg07844369		-0.0541775	0.644333
cg14080155		-0.0179373	0.8786
cg23257256	ATF7IP;ATF7IP;ATF7IP;ATF7IP;ATF7IP	-0.134352	0.250474
cg05378609		0.0107664	0.926955
cg04439077		0.127146	0.277019
cg21777696	SLC43A1;SLC43A1	0.0154826	0.895112
cg15457745	RGS6	0.0198816	0.865557
cg12136088	ASNS;ASNS;ASNS	0.00113438	0.992293
cg10831210	RBM5;RBM5	0.0239907	0.838115
cg00983437	TCF15	0.131709	0.26
cg06667589		-0.0214702	0.854927
cg03472898	C14orf23;C14orf23	0.166895	0.152391
cg25965286	CCDC88C	-0.148789	0.202659
cg08150745		0.0281824	0.810319
cg25214158		0.0562429	0.631742
cg08038178		-0.108481	0.354223
cg03664302		-0.140171	0.230349
cg08239499		-0.0653846	0.577299
cg18664451		-0.232285	0.0449224
cg14635303	SNTG2	0.0336552	0.774381
cg09417399	USP47;USP47	0.0195057	0.868076
cg02139344	DCHS2	-0.194443	0.0945949
cg23799025		0.133886	0.252136
cg10761001	NUDT15;NUDT15	-0.323135	0.00468818
cg18834082		0.0431695	0.713059
cg12205669		-0.0432445	0.712582
cg09715466		0.00275728	0.981269
cg09181230		-0.0886132	0.449642
cg08368905	KIF1B	-0.199355	0.0863957
cg00238899	MXI1;MXI1;MXI1	-0.0878008	0.453824
cg22383924	TP73	-0.0431155	0.713402
cg08918576	OR6K3	-0.0186576	0.873764
cg00725401		-0.0117849	0.920067
cg04852949	COL16A1	0.00100398	0.993179
cg25033767	PTK7;PTK7;PTK7;PTK7	-0.193414	0.0963875
cg04748010	POU6F2;POU6F2	-0.151001	0.195951
cg01222603	SBF2	-0.0485182	0.679339
cg20233619		-0.162597	0.163384
cg23108232		-0.148565	0.203348
cg23621097	HIC1;HIC1	-0.00427908	0.970935
cg23091302	KCNH8	-0.0624687	0.594429
cg11345619		-0.0933023	0.425922
cg03293447	FOXJ3;FOXJ3;FOXJ3;FOXJ3	-0.18528	0.111512
cg12811284	OR6K3	-0.0346987	0.76758
cg04128488	RAB12	-0.152601	0.191199
cg18712199	C14orf23;C14orf23	-0.0189816	0.87159
cg05295217	PRR5L;PRR5L;PRR5L;PRR5L	-0.0868624	0.458683
cg12818107		0.0604046	0.60669
cg19396767		0.0164954	0.888293
cg00703512	KIAA1715;KIAA1715;KIAA1715;KIAA1715;KIAA1715;KIAA1715	-0.106791	0.361815
cg08317694	CRABP1	-0.0820272	0.484162
cg03955055	MBD6	-0.162304	0.164157
cg23285894		0.00270833	0.981602
SDQ: Strength and Difficulties Questionnaire, r: Pearson's correlation cofficient

[truncated: 11 more sheets: S_Table12, S_Table13, S_Table14, S_Table15, S_Table16, S_Table17, S_Table18, S_Table19, S_Table20, S_Table21, S_Table22]
